# Supplementary material
Source: MDPI journal article supplement (https://www.mdpi.com/2071-1050/13/2/994)
Supplement: s1 [file s1]

## Supplemental material

**Table S1** Three-way ANOVA analysis of urea-N application, DMPP addition and sampling date on soil pH, leachate pH and leachate N loss. (*p* values in boldface indicate significant effects)

| Treatments                    | Soil pH          | Leachate pH      | NH <sub>4</sub> <sup>+</sup> -N loss | NO <sub>3</sub> <sup>-</sup> -N loss | Inorganic N loss |
|-------------------------------|------------------|------------------|--------------------------------------|--------------------------------------|------------------|
| Urea-N                        | <b>&lt;0.001</b> | <b>&lt;0.001</b> | <b>&lt;0.001</b>                     | <b>&lt;0.001</b>                     | <b>&lt;0.001</b> |
| DMPP                          | <b>&lt;0.05</b>  | <b>&lt;0.001</b> | <b>&lt;0.001</b>                     | <b>&lt;0.001</b>                     | <b>&lt;0.001</b> |
| Sampling date                 | <b>&lt;0.001</b> | <b>&lt;0.001</b> | <b>&lt;0.001</b>                     | <b>&lt;0.05</b>                      | <b>&lt;0.001</b> |
| Urea-N × Sampling date        | <b>&lt;0.001</b> | <b>&lt;0.001</b> | <b>&lt;0.001</b>                     | <b>&lt;0.01</b>                      | <b>=0.001</b>    |
| DMPP × Sampling date          | =0.60            | <b>&lt;0.001</b> | =0.06                                | <b>&lt;0.001</b>                     | <b>&lt;0.001</b> |
| Urea-N × DMPP                 | <b>&lt;0.001</b> | <b>&lt;0.001</b> | <b>&lt;0.001</b>                     | =0.14                                | <b>=0.02</b>     |
| Urea-N × DMPP × Sampling date | <b>&lt;0.05</b>  | <b>&lt;0.01</b>  | <b>&lt;0.001</b>                     | <b>&lt;0.05</b>                      | <b>&lt;0.001</b> |

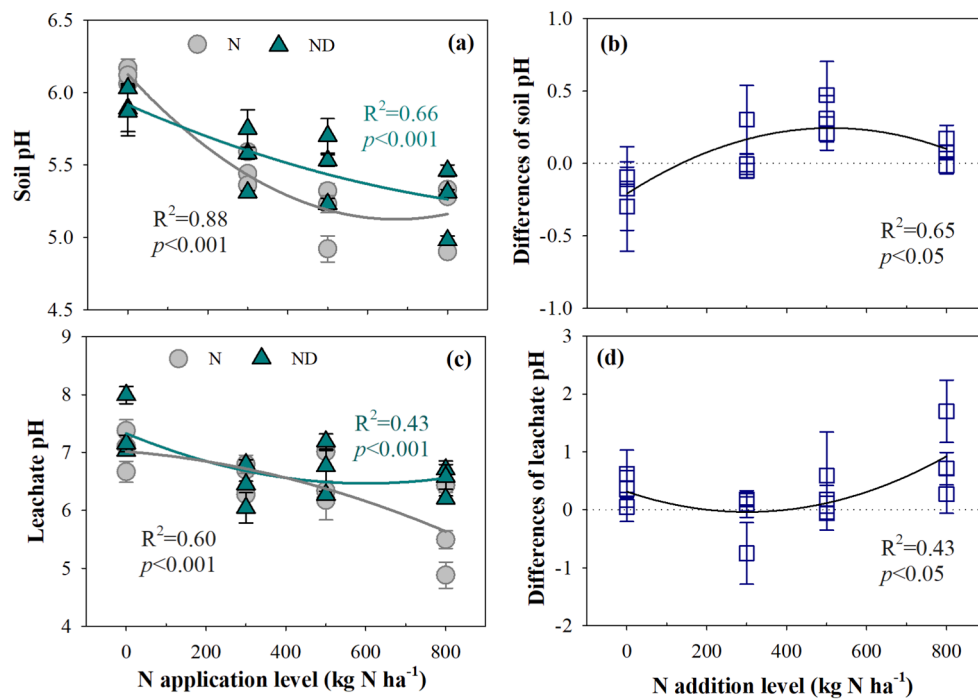

**Figure S1** Relationships of DMPP with mean soil pH (a)/leachate pH (c) and with the differences of mean soil pH (b)/leachate pH (d) between treatment and control (Grey dots: soil/leachate pH under N fertilizer; green triangles: soil/leachate pH under N+DMPP; N: N fertilizer; ND: N+DMPP)

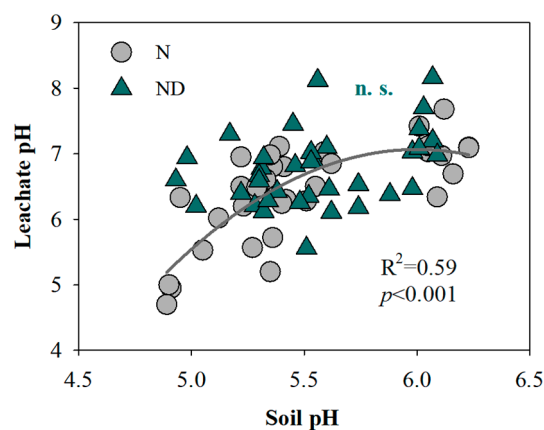

**Figure S2** Relationship of soil pH and leachate pH with increasing urea-N rates across DMPP addition (Grey dots: urea-N application; green triangles: urea-N+DMPP combination)

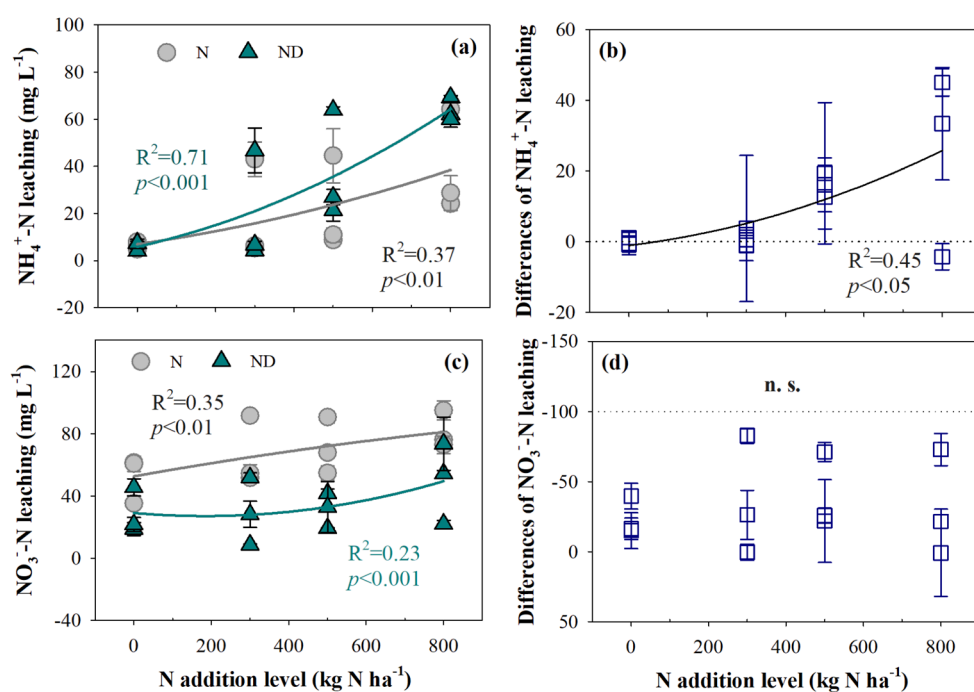

**Figure S3** Relationships of DMPP with leachate  $\text{NH}_4^+\text{-N}$  (a)/ $\text{NO}_3^-\text{-N}$  (c) and with the differences of mean leachate  $\text{NH}_4^+\text{-N}$  (b)/leachate  $\text{NO}_3^-\text{-N}$  (d) between treatment and control (Grey dots: leachate  $\text{NH}_4^+\text{-N}/\text{NO}_3^-\text{-N}$  under N fertilizer; green triangles: leachate  $\text{NH}_4^+\text{-N}/\text{NO}_3^-\text{-N}$  under N+DMPP; N: N fertilizer; ND: N+DMPP)
